# Supplementary material
Source: PubMed Central journal article supplement (PMC4420796)
Supplement: tableS1.pdf [file tableS1.pdf]

# **Supplementary Data for:**

**The role of PGC-1 $\alpha$  during acute exercise-induced autophagy  
and mitophagy in skeletal muscle.**

Anna Vainshtein, Liam D. Tryon, Marion Pauly, and David A.  
Hood

**Table S1 mRNA array data**

| <b>Gene Symbol</b> | <b>p value</b> | <b>Fold change</b> | <b>Gene Symbol</b> | <b>p value</b> | <b>Fold change</b> |
|--------------------|----------------|--------------------|--------------------|----------------|--------------------|
| Akt1               | 0.76           | -2.67              | Eif2ak3            | 0.75           | -2.08              |
| Ambra1             | 0.61           | -1.83              | Eif4g1             | 0.67           | -2.11              |
| App                | 0.73           | -2.49              | Esr1               | 0.58           | -1.96              |
| Atg10              | 0.70           | -2.39              | Fadd               | 0.75           | -2.67              |
| Atg12              | 0.76           | -1.71              | Fas                | 0.58           | -1.61              |
| Atg16l1            | 0.63           | -2.16              | Gaa                | 0.65           | -2.26              |
| Atg16l2            | 0.64           | -2.12              | Gabarap            | 0.67           | -2.02              |
| Atg3               | 0.59           | -1.43              | Gabarap11          | 0.61           | -1.78              |
| Atg4a              | 0.60           | -1.47              | Gabarap12          | 0.74           | -2.01              |
| Atg4b              | 0.65           | -1.99              | Hdac1              | 0.70           | -2.4               |
| Atg4c              | 0.60           | -1.67              | Hdac6              | 0.62           | -2.1               |
| Atg4d              | 0.68           | -2.61              | Hgs                | 0.61           | -1.95              |
| Atg5               | 0.62           | -1.87              | Hsp90aa1           | 0.58           | -1.39              |
| Atg7               | 0.67           | -2.13              | Hspa8              | 0.59           | -1.64              |
| Atg9a              | 0.65           | -1.96              | Htt                | 0.70           | -2.29              |
| Atg9b              | 0.54           | -2.82              | Ifng               | 0.29           | -1.43              |
| Bad                | 0.76           | -2.25              | Igf1               | 0.77           | -2.45              |
| Bak1               | 0.62           | -2                 | Ins2               | 0.52           | -1.1               |
| Bax                | 0.62           | -2.15              | Irgm1              | 0.96           | -2.9               |
| Bcl2               | 0.51           | -1.39              | Lamp1              | 0.62           | -1.87              |
| Bcl2l1             | 0.48           | -1.2               | Map1lc3a           | 0.67           | -2.36              |
| Becn1              | 0.60           | -1.73              | Map1lc3b           | 0.76           | -2.27              |
| Bid                | 0.68           | -2.16              | Mapk14             | 0.64           | -2.02              |
| Bnip3              | 0.68           | -1.93              | Mapk8              | 0.63           | -1.79              |
| Casp3              | 0.81           | -3.15              | Mtor               | 0.03           | -22.44             |
| Casp8              | 0.75           | -2.35              | Nfkb1              | 0.05           | -20.36             |
| Cdkn1b             | 0.66           | -2.19              | Npc1               | 0.05           | -22.12             |
| Cdkn2a             | 0.44           | 1.55               | Pik3c3             | 0.73           | -1.89              |
| Cln3               | 0.65           | -2.27              | Pik3cg             | 0.05           | -10.45             |
| Ctsb               | 0.74           | -2.6               | Pik3r4             | 0.59           | -3.07              |
| Ctsd               | 0.68           | -2.31              | Prkaa1             | 0.60           | -1.76              |
| Ctss               | 0.83           | -2.73              | Pten               | 0.20           | -2.94              |
| Cxcr4              | 0.97           | -3.15              | Rab24              | 0.66           | -2.06              |
| Dapk1              | 0.70           | -2.32              | Rb1                | 0.97           | -2.23              |
| Dram1              | 0.68           | -2                 | Rgs19              | 0.51           | -3.22              |
| Dram2              | 0.65           | -1.56              | Rps6kb1            | 0.61           | -1.59              |

Table S1  
Continued

|         |      |        |
|---------|------|--------|
| Snca    | 0.72 | 1.13   |
| Sqstm1  | 0.67 | -1.84  |
| Tgfb1   | 0.68 | -2.55  |
| Tgm2    | 0.57 | -1.5   |
| Tmem74  | 0.29 | -1.04  |
| Tnf     | 0.00 | -6.3   |
| Tnfsf10 | 0.04 | -18.34 |
| Trp53   | 0.74 | -1.94  |
| Ulk1    | 0.47 | -3.06  |
| Ulk2    | 0.28 | -2.59  |
| Uvrag   | 0.54 | -1.52  |
| Wipi1   | 0.74 | -2.25  |
